# Supplementary material for: One step conversion of bio-based magnolol into low k materials at high frequency
Source: Royal Society of Chemistry journal article supplement (doi:10.1039/d4su00002a), 2024-01-01
Supplement: d4su00002a1.pdf [file d4su00002a1.pdf]

Supporting Information for

## A Facile One-Step Conversion of Bio-based Magnolol into the Low $k$ Materials at High Frequency

Zhuoyi Yang, Jing Sun,\* and Qiang Fang\*

Key Laboratory of Synthetic and Self-Assembly Chemistry for Organic Functional Molecules, Shanghai Institute of Organic Chemistry, Chinese Academy of Sciences, 345 Lingling Road, Shanghai 200032, P. R. China. Center for Excellence in Molecular Synthesis, Shanghai Institute of Organic Chemistry, Chinese Academy of Sciences, 345 Lingling Road, Shanghai 200032, P. R. China. University of Chinese Academy of Sciences, 19 Yuquan Road, Shijingshan District, Beijing 100049, P. R. China. E-mail: qiangfang@sioc.ac.cn.

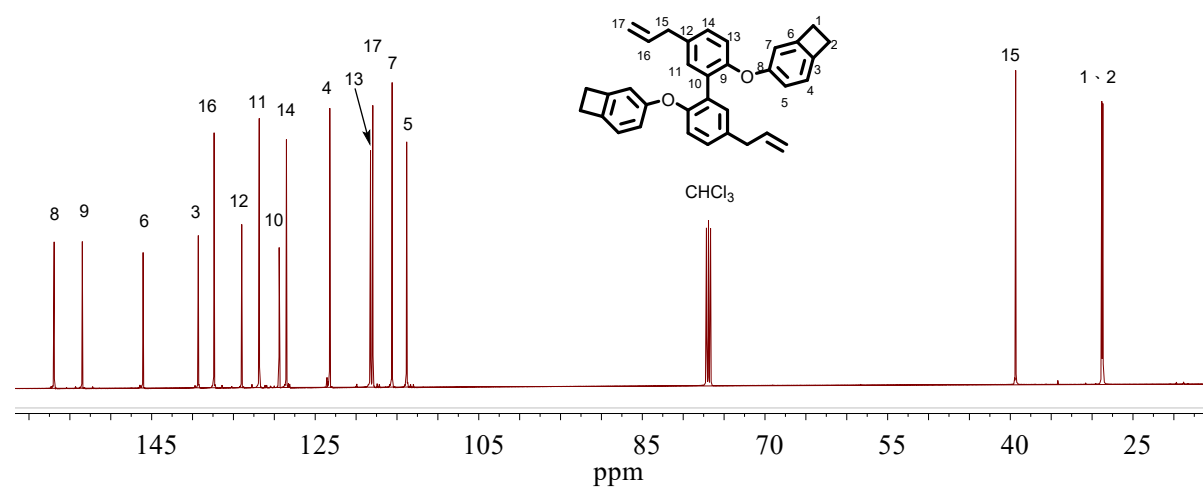

**Figure S1.**  $^{13}\text{C}$  NMR spectrum of M1 in  $\text{CDCl}_3$  at 126 MHz.
